# Supplementary material for: Surface Area of Wood Influences the Effects of Fungal Interspecific Interaction on Wood Decomposition—A Case Study Based on Pinus densiflora and Selected White Rot Fungi
Source: MDPI journal article supplement (doi:10.3390/jof8050517), 2022-05-18
Supplement: s1 [file s1]

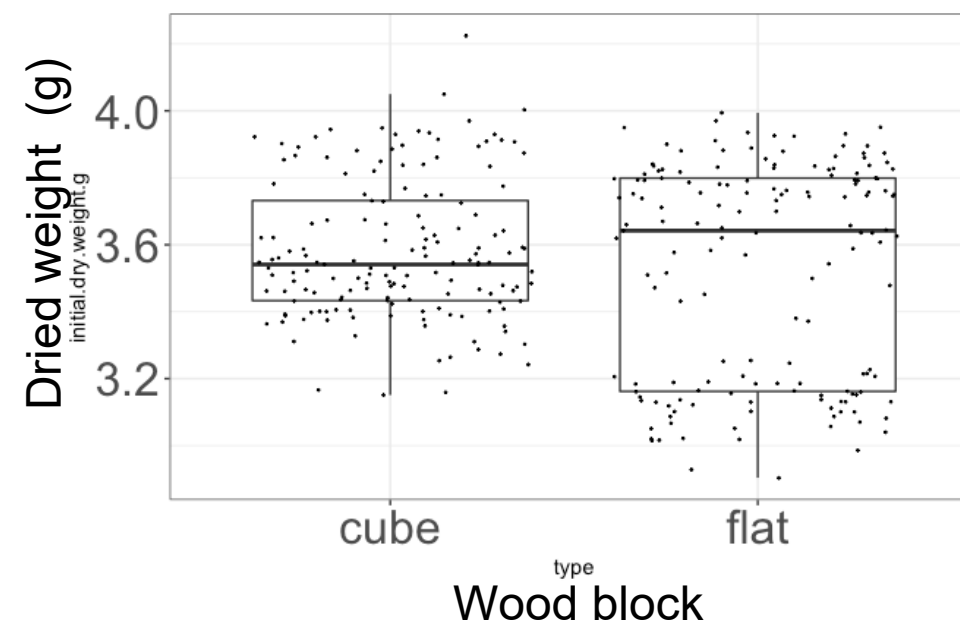

Figure S1 Dried weight of the cube and flat wood blocks before fungal inoculation. Significant difference between cube and flat was not detected by Wilcoxon rank-sum test ( $P < 0.05$ ).  $N = 159$ .

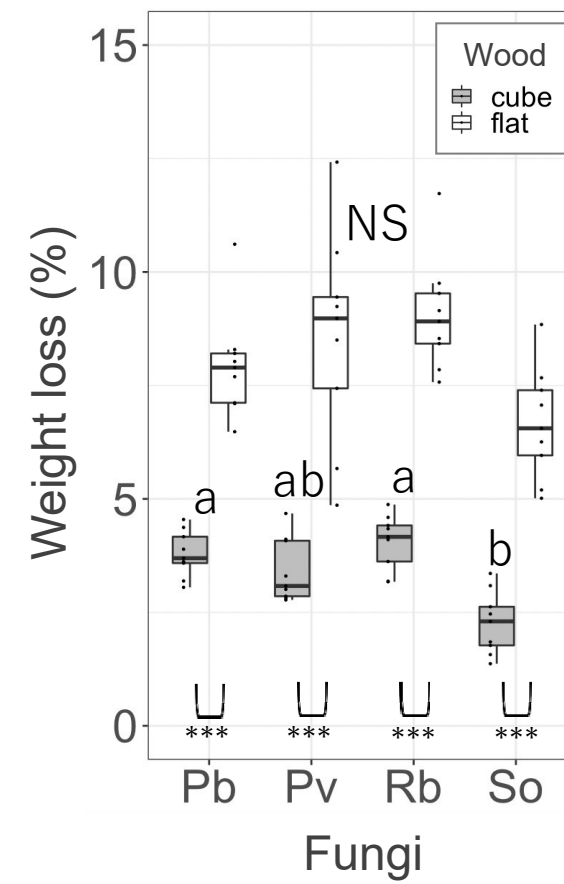

Figure S2 Weight loss of wood blocks after 3 months incubation in pure culture of the four fungal strains. NS and the same alphabets indicate no significant differences among fungal strains in the post hoc Nemenyi test (uppercase, flat; lowercase, cube). Comparison between flat and cube blocks within a strain was performed using the Wilcoxon rank sum test (\*\*\*,  $P < 0.001$ ). N = 6.
